# Supplementary material for: MicroRNA-152-5p inhibits proliferation and migration and promotes apoptosis by regulating expression of Smad3 in human keloid fibroblasts
Source: PubMed Central journal article supplement — BMB Rep. 2019 Mar 31;52(3):202–7. doi: 10.5483/BMBRep.2019.52.3.278 (PMC6476487; doi:10.5483/bmbrep.2019.52.3.278), 2019-03-31
Supplement: BMB-52-202_suppl.pdf [file BMB-52-202_suppl.pdf]

**Manuscript Type:** Article

**Title:** MicroRNA-152-5p inhibits proliferation and migration and promotes apoptosis by regulating expression of Smad3 in human keloid fibroblasts.

**Author's name:** Qianqian Pang<sup>1</sup>, Yuming Wang<sup>1</sup>, Mingyuan Xu<sup>1</sup>, Jiachao Xu<sup>2</sup>, Shengquan Xu<sup>3</sup>, Yichen Shen<sup>1</sup>, Jinghong Xu<sup>1</sup>, Rui Lei<sup>1</sup>.

**Corresponding Author's name:** Jinghong Xu

**Affiliation:**

1. Department of Plastic Surgery, The First Affiliated Hospital, School of Medicine, Zhejiang University, Hangzhou, 310003, China

2. Department of internal medicine, Haiyan Hospital of traditional Chinese medicine, Jiaxin, 314300, China

3. Department of Hand Surgery and Microsurgery Center, The First Affiliated Hospital, School of Medicine, Zhejiang University, Hangzhou, 310003, China

**Running Title:** The role of miR-152-5p in Keloids

**Keywords:** miR-152-5p, Smad3, proliferation, apoptosis, keloid

**Corresponding Author's Information:**

Tel: 86 13758229331 Email: 1304017@zju.edu.cn

Supplementary-table 1:

The profile of samples for primary culture

| HKFs from patients | sex    | Age (yr) | Biopsy Site | Duration(yr) | Etiology | previous treatment |
|--------------------|--------|----------|-------------|--------------|----------|--------------------|
| HKF1               | Female | 28       | earlobe     | 3            | Piercing | None               |
| HKF2               | Male   | 30       | Back        | 4            | injury   | None               |
| HKF3               | Female | 25       | earlobe     | 1            | Piercing | None               |
| HKF4               | Female | 25       | earlobe     | 5            | Piercing | None               |
| HKF5               | Female | 20       | earlobe     | 5            | unknown  | None               |
| HKF6               | Male   | 15       | earlobe     | 2            | Piercing | None               |
| HKF7               | Female | 20       | earlobe     | 5            | Piercing | None               |
| HKF8               | Female | 18       | earlobe     | 3            | Piercing | None               |
| HKF9               | Male   | 32       | earlobe     | 2            | Piercing | None               |
| HKF10              | Male   | 32       | earlobe     | 3            | Piercing | None               |

A: Cells were isolated from the discarded tissues from 10 patients who had a keloid at least 1-year evolution, with clinical activity such as fast growth, hyperemia, pruritus, and pain. Exclusion criteria include cancer, genetic or infectious diseases, and preoperative radiotherapy or chemotherapy.

Supplementary-table 2.

Nucleotide sequences of primers used for PCR

| Gene       | Sequence                      |
|------------|-------------------------------|
| GAPDH-F    | 5'-GGAGCGAGATCCCTCCAAAAT-3'   |
| GAPDH-R    | 5'-GGCTGTTGTCATACTTCTCATGG-3' |
| U6-F       | 5'-TGGAACGCTTCACGAATTTGCG-3'  |
| U6-R       | 5'-GGAACGATACAGAGAAGATTAGC-3' |
| Smad3-F    | 5'-TGGACGCAGGTTCTCCAAAC-3'    |
| Smad3-R    | 5'-CCGGCTCGCAGTAGGTAAC-3'     |
| miR-152-5p | 5'-AGGTTCTGTGATACTCCGACT-3'   |

A: F, forward primer; R, reverse primer

Supplementary-table 3.

corresponding sequences used for transfection

| Sence                | Sequence                       |
|----------------------|--------------------------------|
| miR-152-5p mimic     | 5'-AGGUUCUGUGAUACACUCCGACU-3'  |
| miR-152-5p inhibitor | 5'-AGUCGGAGUGUAUCACAGAACCU-3'  |
| si- Smad3-1          | 5'- CCGCAUGAGCUUC GUCAAAdTdT-3 |
| si- Smad3-2          | 5'-GCGUGAAUCCCUACCACUAdTdT-3'  |
| si- Smad3-3          | 5'-GCCA UCCAUGACUGUGGAUdTdT-3' |
| NC                   | 5'-ACTACTGAGTGACAGTAGA-3'      |
